# Supplementary material for: An Explainable Deep Learning Classifier of Bovine Mastitis Based on Whole-Genome Sequence Data—Circumventing the p >> n Problem
Source: MDPI journal article supplement (doi:10.3390/ijms25094715), 2024-04-26
Supplement: s1 [file s1]

| C          | Threshold    | Train LASSO AUC | Test LASSO AUC | Train AUC    | Test AUC     | Train ACC (Default cut-off value) | Train ACC (Optimal cut-off value) | Test ACC (Default cut-off value) | Test ACC (Optimal cut-off value) |
|------------|--------------|-----------------|----------------|--------------|--------------|-----------------------------------|-----------------------------------|----------------------------------|----------------------------------|
| 0.1        | 0.612        | 1.000           | 0.420          | 0.952        | 0.700        | 0.742                             | 0.900                             | 0.600                            | 0.650                            |
| 0.2        | 0.893        | 1.000           | 0.410          | 0.983        | 0.505        | 0.516                             | 0.936                             | 0.500                            | 0.450                            |
| 0.3        | 0.745        | 1.000           | 0.440          | 0.956        | 0.555        | 0.516                             | 0.936                             | 0.500                            | 0.450                            |
| <b>0.4</b> | <b>0.643</b> | <b>1.000</b>    | <b>0.460</b>   | <b>0.927</b> | <b>0.750</b> | <b>0.516</b>                      | <b>0.839</b>                      | <b>0.500</b>                     | <b>0.650</b>                     |
| 0.5        | 0.669        | 1.000           | 0.480          | 0.890        | 0.625        | 0.677                             | 0.871                             | 0.600                            | 0.550                            |
| 0.6        | 0.721        | 1.000           | 0.480          | 0.904        | 0.400        | 0.516                             | 0.903                             | 0.500                            | 0.500                            |
| 0.7        | 0.550        | 1.000           | 0.490          | 0.908        | 0.580        | 0.710                             | 0.903                             | 0.450                            | 0.650                            |
| 0.8        | 0.142        | 1.000           | 0.480          | 0.915        | 0.425        | 0.484                             | 0.903                             | 0.500                            | 0.300                            |
| 0.9        | 0.685        | 1.000           | 0.490          | 1.000        | 0.700        | 1.000                             | 1.000                             | 0.700                            | 0.550                            |
| 1.0        | 0.685        | 1.000           | 0.470          | 0.908        | 0.500        | 0.613                             | 0.839                             | 0.500                            | 0.450                            |

| C          | Train Sensitivity | Train Specificity | Test Sensitivity | Test Specificity | Train MCC    | Test MCC     |
|------------|-------------------|-------------------|------------------|------------------|--------------|--------------|
| 0.1        | 1.000             | 0.800             | 0.800            | 0.500            | 0.747        | 0.314        |
| 0.2        | 0.875             | 1.000             | 0.100            | 0.800            | 0.879        | -0.140       |
| 0.3        | 1.000             | 0.867             | 0.200            | 0.700            | 0.878        | -0.115       |
| <b>0.4</b> | <b>0.938</b>      | <b>0.733</b>      | <b>0.600</b>     | <b>0.700</b>     | <b>0.688</b> | <b>0.302</b> |
| 0.5        | 0.875             | 0.867             | 0.600            | 0.500            | 0.742        | 0.101        |
| 0.6        | 0.938             | 0.867             | 0.500            | 0.500            | 0.742        | 0.000        |
| 0.7        | 0.875             | 0.933             | 0.500            | 0.800            | 0.619        | 0.314        |
| 0.8        | 0.875             | 0.933             | 0.200            | 0.400            | 0.808        | -0.408       |
| 0.9        | 1.000             | 1.000             | 0.200            | 0.900            | 0.938        | 0.140        |
| 1.0        | 0.750             | 0.933             | 0.300            | 0.600            | 0.692        | -0.105       |

*Supplementary Table S1.* Comparison of performance metrics for various models with different C parameters and thresholds. The chosen model in downstream analysis is bolded.
