# Supplementary material for: An Explainable Deep Learning Classifier of Bovine Mastitis Based on Whole-Genome Sequence Data—Circumventing the p >> n Problem
Source: MDPI journal article supplement (doi:10.3390/ijms25094715), 2024-04-26
Supplement: s1 [file s1]

| GO ID                     | Gene Names                                                                                                                                                                                                                                                                                                                                                                                                                                                                                                                                                                                                                                                        | Number of SNPs | FDR <sub>GO</sub> |
|---------------------------|-------------------------------------------------------------------------------------------------------------------------------------------------------------------------------------------------------------------------------------------------------------------------------------------------------------------------------------------------------------------------------------------------------------------------------------------------------------------------------------------------------------------------------------------------------------------------------------------------------------------------------------------------------------------|----------------|-------------------|
| <i>Biological process</i> |                                                                                                                                                                                                                                                                                                                                                                                                                                                                                                                                                                                                                                                                   |                |                   |
| <i>GO:0050804</i>         | APP, CLSTN2, CPLX1, DGKI, GRIA1, GRID1, GRID2, GRIK2, GRIK3, GRM8, KIF5B, LRFN2, NEURL1, NRG3, NTRK2, PACSIN2, PCDH17, PLCB4, PLCL1, PLCL2, PRKCB, PRKN, PXK, RASGRF2, SCGN, SHANK1, SLC24A2, SLC8A3, STX3, SYT1, UNC13C                                                                                                                                                                                                                                                                                                                                                                                                                                          | 45             | 3.570E-03         |
| <i>Molecular function</i> |                                                                                                                                                                                                                                                                                                                                                                                                                                                                                                                                                                                                                                                                   |                |                   |
| <i>GO:0005509</i>         | ALOX15B, CCBE1, CDH12, CDH5, CDH9, CHP2, CLSTN2, CRACR2B, EDIL3, EHD4, F7, FAT3, FBLN5, FSTL5, GUCA1A, HMCN1, HPCAL1, HSPG2, IQGAP1, KCNIP4, LRP2, NOTCH4, PAM, PCDH15, PCDH17, PCDH7, PLA2G4A, PLA2G5, PLCB4, RYR2, S100A9, SCGN, SCUBE1, SHH, SLIT1, STIM1, SVEP1, SYT1, TGM2, TLL1, TRPM2, UNC13A, UNC13C                                                                                                                                                                                                                                                                                                                                                      | 70             | 6.303E-04         |
| <i>GO:0030554</i>         | ABCA6, ABCD3, ACOT12, ALPK1, ASCC3, ATP11A, BMPR2, CAMK1D, CAMK2B, CDC42BPB, CDK14, CFTR, CHD7, CLPX, DAPK1, DARS1, DDR2, DGKI, DNAH5, DPH6, EHD4, ENTPD6, EPHA3, EPHA7, HIPK2, HK2, KIF16B, KIF5B, KIT, LONP2, LRRK1, MAPK10, MARK3, MCM6, MLH3, MYH14, MYO18B, MYO1E, MYO3B, MYO5C, MYO6, MYO7A, NADSYN1, NAV3, NEK7, NTRK2, NTRK3, NUBPL, PAK1, PCCA, PDE10A, PDE4A, PDE4B, PFKP, PIK3C2G, PRKACB, PRKAG2, PRKAR2A, PRKCA, PRKCB, PRKCH, PTK2, PXK, RAD51B, RAPGEF4, ROR1, RPS6KA1, RUNX1, SMC1A, STK3, STK33, TDRD9, TPK1, UBE2E2, UBE2E3, UBE2U, ULK1, ZRANB3                                                                                                | 141            | 1.130E-03         |
| <i>GO:0032559</i>         | ABCA6, ABCD3, ACOT12, ALPK1, ASCC3, ATP11A, BMPR2, CAMK1D, CAMK2B, CDC42BPB, CDK14, CFTR, CHD7, CLPX, DAPK1, DARS1, DDR2, DGKI, DNAH5, DPH6, EHD4, ENTPD6, EPHA3, EPHA7, HIPK2, HK2, KIF16B, KIF5B, KIT, LONP2, LRRK1, MAPK10, MARK3, MCM6, MLH3, MYH14, MYO18B, MYO1E, MYO3B, MYO5C, MYO6, MYO7A, NADSYN1, NAV3, NEK7, NTRK2, NTRK3, NUBPL, PAK1, PCCA, PDE10A, PDE4A, PDE4B, PFKP, PIK3C2G, PRKACB, PRKAG2, PRKAR2A, PRKCA, PRKCB, PRKCH, PTK2, PXK, RAD51B, RAPGEF4, ROR1, RPS6KA1, RUNX1, SMC1A, STK3, STK33, TDRD9, TPK1, UBE2E2, UBE2E3, UBE2U, ULK1, ZRANB3                                                                                                | 141            | 1.130E-03         |
| <i>GO:0005524</i>         | ABCA6, ABCD3, ACOT12, ALPK1, ASCC3, ATP11A, BMPR2, CAMK1D, CAMK2B, CDC42BPB, CDK14, CFTR, CHD7, CLPX, DAPK1, DARS1, DDR2, DGKI, DNAH5, DPH6, EHD4, ENTPD6, EPHA3, EPHA7, HIPK2, HK2, KIF16B, KIF5B, KIT, LONP2, LRRK1, MAPK10, MARK3, MCM6, MLH3, MYH14, MYO18B, MYO1E, MYO3B, MYO5C, MYO6, MYO7A, NADSYN1, NAV3, NEK7, NTRK2, NTRK3, NUBPL, PAK1, PCCA, PFKP, PIK3C2G, PRKACB, PRKAG2, PRKCA, PRKCB, PRKCH, PTK2, PXK, RAD51B, ROR1, RPS6KA1, RUNX1, SMC1A, STK3, STK33, TDRD9, TPK1, UBE2E2, UBE2E3, UBE2U, ULK1, ZRANB3                                                                                                                                        | 136            | 4.745E-03         |
| <i>GO:0032553</i>         | ABCA6, ABCD3, ACOT12, ALPK1, ARF4, ASCC3, ATP11A, BMPR2, CAMK1D, CAMK2B, CDC42BPB, CDK14, CFTR, CHD7, CLPX, CNGB3, DAPK1, DARS1, DDR2, DGKI, DNAH5, DPH6, EHD4, ENTPD6, EPHA3, EPHA7, GTPBP10, GUCY1A2, HIPK2, HK2, KIF16B, KIF5B, KIT, LONP2, LRRK1, MAPK10, MARK3, MCM6, MFN1, MLH3, MYH14, MYO18B, MYO1E, MYO3B, MYO5C, MYO6, MYO7A, NADSYN1, NAV3, NEK7, NOS1, NTRK2, NTRK3, NUBPL, PAK1, PCCA, PDE10A, PDE4A, PDE4B, PFKP, PIK3C2G, PRKACB, PRKAG2, PRKAR2A, PRKCA, PRKCB, PRKCH, PTK2, PXK, RAB30, RAB7B, RAD51B, RAPGEF4, RHOBTB3, ROR1, RPS6KA1, RRAGD, RUNX1, SEPTIN9, SMC1A, SRP54, STK3, STK33, TDRD9, TGM2, TPK1, UBE2E2, UBE2E3, UBE2U, ULK1, ZRANB3 | 161            | 4.745E-03         |
| <i>GO:0032555</i>         | ABCA6, ABCD3, ACOT12, ALPK1, ARF4, ASCC3, ATP11A, BMPR2, CAMK1D, CAMK2B, CDC42BPB, CDK14, CFTR, CHD7, CLPX, CNGB3, DAPK1, DARS1, DDR2, DGKI, DNAH5, DPH6, EHD4, ENTPD6, EPHA3, EPHA7, GTPBP10, GUCY1A2, HIPK2, HK2, KIF16B, KIF5B, KIT, LONP2, LRRK1, MAPK10, MARK3, MCM6, MFN1, MLH3, MYH14, MYO18B, MYO1E, MYO3B, MYO5C, MYO6, MYO7A, NADSYN1, NAV3, NEK7, NTRK2, NTRK3, NUBPL, PAK1, PCCA, PDE10A, PDE4A, PDE4B, PFKP, PIK3C2G, PRKACB, PRKAG2, PRKAR2A, PRKCA, PRKCB, PRKCH, PTK2, PXK, RAB30, RAB7B, RAD51B, RAPGEF4, RHOBTB3, ROR1, RPS6KA1, RRAGD, RUNX1, SEPTIN9, SMC1A, SRP54, STK3, STK33, TDRD9, TGM2, TPK1, UBE2E2, UBE2E3, UBE2U, ULK1, ZRANB3       | 160            | 4.756E-03         |
| <i>GO:0017076</i>         | ABCA6, ABCD3, ACOT12, ALPK1, ARF4, ASCC3, ATP11A, BMPR2, CAMK1D, CAMK2B, CDC42BPB, CDK14, CFTR, CHD7, CLPX, CNGB3, DAPK1, DARS1, DDR2, DGKI, DNAH5, DPH6, EHD4, ENTPD6, EPHA3, EPHA7, GTPBP10, GUCY1A2, HIPK2, HK2, KIF16B, KIF5B, KIT, LONP2, LRRK1, MAPK10, MARK3, MCM6, MFN1, MLH3, MYH14, MYO18B, MYO1E, MYO3B, MYO5C, MYO6, MYO7A, NADSYN1, NAV3, NEK7, NTRK2, NTRK3, NUBPL, PAK1, PCCA, PDE10A, PDE4A, PDE4B, PFKP, PIK3C2G, PRKACB, PRKAG2, PRKAR2A, PRKCA, PRKCB, PRKCH, PTK2, PXK, RAB30, RAB7B, RAD51B, RAPGEF4, RHOBTB3, ROR1, RPS6KA1,                                                                                                                | 160            | 5.599E-03         |

|                   |                                                                                                                                                                                                                                     |    |           |
|-------------------|-------------------------------------------------------------------------------------------------------------------------------------------------------------------------------------------------------------------------------------|----|-----------|
|                   | RRAGD, RUNX1, SEPTIN9, SMC1A, SRP54, STK3, STK33, TDRD9, TGM2, TPK1, UBE2E2, UBE2E3, UBE2U, ULK1, ZRANB3                                                                                                                            |    |           |
| <u>GO:0005216</u> | ANO10, ANO5, CACNA1D, CACNA1S, CACNA2D3, CFTR, CNGB3, GABRB1, GRIA1, GRID1, GRID2, GRIK2, GRIK3, KCNC3, KCNC4, KCNH1, KCNIP4, KCNK2, KCNK9, LRRC52, PIEZO2, RYR2, SEC61A1, SLC24A2, SLC24A4, SLC26A7, SLC9C1, TMEM63B, TRPC6, TRPM2 | 39 | 4.511E-02 |
| GO:0031267        | AKAP13, CAV1, CYFIP2, DGKI, DOCK4, IQGAP1, IQGAP2, PAK1, PLCE1, PRKCH, RAB11FIP2, RAB3GAP2, RAPGEF4, RASSF5, RHOBTB3, SYTL3, ULK1, WASF1, YIPF2                                                                                     | 26 | 4.511E-02 |
| <u>GO:0005096</u> | ABR, ARHGAP10, ARHGAP22, ARHGAP29, ARHGAP31, ARHGAP36, DAB2IP, ELMOD3, IQGAP1, IQGAP2, RAB3GAP2, RALGAPA2, RAP1GDS1, RASA3, SRGAP1, TBC1D17, TBC1D4, TBC1D5                                                                         | 24 | 4.786E-02 |
| GO:0017075        | CPLX1, DAPK1, SYBU, SYT1, UNC13A, UNC13C                                                                                                                                                                                            | 7  | 4.786E-02 |
| <u>GO:0022838</u> | ANO10, ANO5, CACNA1D, CACNA1S, CACNA2D3, CFTR, CNGB3, GABRB1, GRIA1, GRID1, GRID2, GRIK2, GRIK3, KCNC3, KCNC4, KCNH1, KCNIP4, KCNK2, KCNK9, LRRC52, PIEZO2, RYR2, SEC61A1, SLC24A2, SLC24A4, SLC26A7, SLC9C1, TMEM63B, TRPC6, TRPM2 | 39 | 4.786E-02 |
| GO:0008276        | ASH1L, ATPSCKMT, CARM1, LCMT1, NSD1, PCMTD1, SETDB2, SMYD3, SUV39H1, WDR5                                                                                                                                                           | 12 | 4.890E-02 |

*Supplementary Table S2.* Significant GO terms with related gene names and SNP numbers inside them. The enrichment analysis was carried out on significant SNPs subset based on selected DL-based SNPs set. The GO terms overlapping between the GWAS-based and the DL-based significant enrichment have been underlined.
